# Supplementary material for: Anti-inflammatory, anti-angiogenetic and antiviral activities of dammarane-type triterpenoid saponins from the roots of Panax notoginseng
Source: Royal Society of Chemistry journal article supplement (doi:10.1039/d1fo04089h), 2022-01-01
Supplement: d1fo04089h1.pdf [file d1fo04089h1.pdf]

## Supporting information

### Anti-inflammatory, anti-angiogenetic and antiviral activities of dammarane-type triterpenoid saponins from the roots of *Panax notoginseng*

Yuan-ru Zheng<sup>a,\*</sup>, Chun-lin Fan<sup>b,\*</sup>, Ye Chen<sup>b,\*</sup>, Jing-yu Quan<sup>a</sup>, Ling-zhu Shi<sup>a</sup>, Chun-  
yang Tian<sup>a</sup>, Xiao Shang<sup>b</sup>, Ni-shan Xu<sup>a</sup>, Wen-cai Ye<sup>b</sup>, Lin-zhong Yu<sup>a,#</sup>, Jun-shan  
Liu<sup>a,c,#</sup>

#### General experimental procedures

Optical rotations were recorded on a JASCO P-1020 polarimeter (Jasco, Tokyo, Japan). UV spectra were recorded on a JASCO V-550 UV/Vis spectrophotometer (Jasco, Tokyo, Japan). IR spectra were determined on a JASCO FT/IR-480 plus Fourier transform infrared spectrometer (JASCO, Tokyo, Japan) using KBr pellets. HR-ESI-MS data were recorded on an Agilent 6210 MSD TOF mass spectrometer (Agilent technologies, CA, USA) and Waters Xevo G2 QToF (Waters, USA), The NMR spectra were recorded on AV-600/400/300 spectrometers (Bruker, fallanden, Switzerland). Analytical HPLC was performed on Agilent 1260 Infinity with a VWD detector (Agilent technologies, CA, USA) and an analytical column (COSMOSIL 5C18-MS-II, 5  $\mu$ m, 4.6  $\times$  250 mm). Preparative HPLC was performed on Agilent 1260 Infinity equipped with an UV detector (Agilent technologies, CA, USA) and a semi-preparative column (COSMOSIL 5C18-MS-II, 5  $\mu$ m, 10  $\times$  250 mm). Thin-layer chromatography (TLC) was performed using precoated silica gel plates (GF254, Qingdao, P. R. China), ODS (Daisogel, Japan) and Sephadex LH-20 (Pharmacia Biotec AB, Sweden).

## Chemicals and Reagents

*L*-cysteine methyl ester hydrochlorid was purchased from Adamas Reagent Co., Ltd (Shanghai, China). *O*-Tolyl Isothiocyanate and monosaccharide standards were obtained from Macklin Co., Ltd (Shanghai, China). LPS (*E. coli*, 055: B5, L2880) and dimethyl sulphoxide (DMSO) were purchased from Sigma-Aldrich Co., Ltd (St Louis, MO, USA). Tricaine was obtained from Macklin (Shanghai, China). Methylene blue was provided by Meilunbio (Dalian, China). Dexamethasone (Dex) was from Tianxin (Guangzhou, China). RNAiso Plus, the PrimeScript<sup>®</sup> RT Reagent kit and TB Green<sup>™</sup> Premix Ex Taq<sup>™</sup> II were obtained from TaKaRa Biotechnology Co., Ltd (Shiga, Japan).

The crude extract of *P. notoginseng* was provided by Guangxi Wuzhou Pharmaceutical Group Co., Ltd.

**Table S1** Primer sequence of qRT-PCR

| Primer name              | Primer sequence (5'→3')  |
|--------------------------|--------------------------|
| $\beta$ -actin –F        | ATGGATGAGGAAATCGCTG      |
| $\beta$ -actin –R        | ATGCCAACCATCACTCCCTG     |
| IL-6 –F                  | AGACCGCTGCCTGTCTAAAA     |
| IL-6 –R                  | TTTGATGTCGTTACCAGGA      |
| TNF- $\alpha$ –F         | GCTGGATCTTCAAAGTCGGGTGTA |
| TNF- $\alpha$ –R         | TGTGAGTCTCAGCACACTTCCATC |
| NF- $\kappa$ B –F        | GAGCCCTTTGTGCAAGAGAC     |
| NF- $\kappa$ B –R        | TGGGATACGTCCCTCCTGTTT    |
| I $\kappa$ B $\alpha$ –F | GGTGGAAAGACTCCTGAAAGC    |
| I $\kappa$ B $\alpha$ –R | TGTAGTTAGGGAAGGTAAGAATG  |
| MyD88 –F                 | GAGGATGGTGGTGGTCATCT     |
| MyD88 –R                 | CGACAGGGATTAGCCGTTTA     |
| STAT3 –F                 | CCCTGGGACTAACTCTGGCA     |
| STAT3 –R                 | AGAGGTCCTGGATTGGCCTC     |

**Table S2** <sup>1</sup>H NMR data of compound **9** and **10** (pyridine-*d*<sub>5</sub>, *J* in Hz)<sup>a</sup>

| No. | <b>9</b>           | <b>10</b>          | No.        | <b>9</b>            | <b>10</b>           |
|-----|--------------------|--------------------|------------|---------------------|---------------------|
| 1   | 1.53               | 1.55, 0.73         | 28         | 1.28 s              | 1.28 s              |
| 2   | 2.21, 1.85         | 2.21, 1.84         | 29         | 1.10 s              | 1.10 s              |
| 3   | 3.26 dd (11.7,4.6) | 3.25 dd (11.9,4.5) | 30         | 0.96 s              | 0.94 s              |
| 5   | 0.65 (11.3)        | 0.65 d (11.8)      | C-3 sugars |                     |                     |
| 6   | 1.48, 1.36         | 1.59, 1.48         | 1'         | 4.92 d (7.5)        | 4.92 d (7.6)        |
| 7   | 1.46, 1.2          | 1.47, 1.19         | 2'         | 4.25                | 4.25                |
| 9   | 1.35               | 1.35               | 3'         | 4.16                | 4.25                |
| 11  | 1.98, 1.59         | 1.95, 1.52         | 4'         | 4.35                | 4.37                |
| 12  | 4.16               | 4.13               | 5'         | 3.94                | 3.93                |
| 13  | 1.97               | 1.97               | 6'         | 4.58, 4.49          | 4.57, 4.48          |
| 15  | 1.48, 1.03         | 1.52, 1.00         | 1''        | 5.37 d (7.6)        | 5.37 d (7.6)        |
| 16  | 2.21, 1.85         | 1.84, 1.34         | 2''        | 4.13                | 4.13                |
| 17  | 2.54               | 2.54               | 3''        | 4.33                | 4.33                |
| 18  | 0.95 s             | 0.95 s             | 4''        | 4.16                | 4.14                |
| 19  | 0.80 s             | 0.80 s             | 5''        | 3.94                | 3.93                |
| 20  | -                  | -                  | 6''        | 4.49, 4.35          | 4.48, 4.36          |
| 21  | 1.56 s             | 1.57 s             | C-20 sugar |                     |                     |
| 22  | 2.38, 1.81         | 2.38, 1.81         | 1'''       | 5.07 d (7.5)        | 5.00 d (7.2)        |
| 23  | 2.51, 2.22         | 2.53, 2.25         | 2'''       | 3.98                | 4.41                |
| 24  | 5.28 t (7.2)       | 5.27 t (6.6)       | 3'''       | 4.25                | 4.18                |
| 26  | 1.64 s             | 1.63 s             | 4'''       | 4.16                | 4.29                |
| 27  | 1.62 s             | 1.61 s             | 5'''       | 4.29, 3.70 t (10.2) | 4.28, 3.77 d (12.0) |

a: 600 MHz; overlapped signals are reported without designating multiplicity

**Table S3**  $^{13}\text{C}$  NMR data of compound **9** and **10** (pyridine- $d_5$ , 600 MHz)

| No. | <b>9</b> | <b>10</b> | No.         | <b>9</b> | <b>10</b> |
|-----|----------|-----------|-------------|----------|-----------|
| 1   | 39.4     | 39.4      | 26          | 26.1     | 26.1      |
| 2   | 27.0     | 27.0      | 27          | 18.0     | 18.1      |
| 3   | 89.2     | 89.2      | 28          | 28.4     | 28.4      |
| 4   | 40.0     | 40.0      | 29          | 16.5     | 16.5      |
| 5   | 56.6     | 56.6      | 30          | 17.7     | 17.7      |
| 6   | 18.7     | 18.7      | C-3 sugars  |          |           |
| 7   | 35.4     | 35.4      | 1'          | 105.4    | 105.4     |
| 8   | 40.3     | 40.3      | 2'          | 83.6     | 83.6      |
| 9   | 50.4     | 50.4      | 3'          | 79.4     | 78.6      |
| 10  | 37.1     | 37.1      | 4'          | 71.9     | 72.0      |
| 11  | 31.1     | 31.1      | 5'          | 78.4     | 78.2      |
| 12  | 70.4     | 70.3      | 6'          | 63.1     | 63.1      |
| 13  | 49.7     | 49.7      | 1''         | 106.3    | 106.3     |
| 14  | 51.7     | 51.6      | 2''         | 77.4     | 77.4      |
| 15  | 31.0     | 31.0      | 3''         | 78.6     | 78.4      |
| 16  | 26.9     | 26.9      | 4''         | 71.8     | 71.8      |
| 17  | 52.0     | 51.8      | 5''         | 78.6     | 78.6      |
| 18  | 16.9     | 16.9      | 6''         | 62.9     | 62.9      |
| 19  | 16.2     | 16.3      | C-20 sugars |          |           |
| 20  | 83.5     | 83.3      | 1'''        | 99.1     | 99.0      |
| 21  | 22.5     | 22.5      | 2'''        | 75.2     | 72.8      |
| 22  | 36.3     | 36.3      | 3'''        | 78.2     | 75.6      |
| 23  | 23.5     | 23.4      | 4'''        | 71.2     | 69.9      |
| 24  | 126.1    | 126.1     | 5'''        | 67.3     | 67.2      |
| 25  | 131.4    | 131.4     |             |          |           |

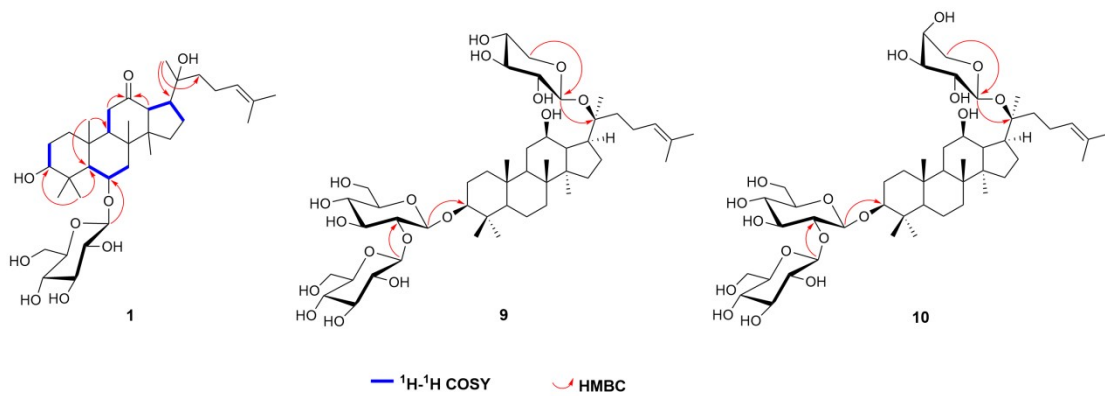

**Figure S1.** Key  $^1\text{H}$ - $^1\text{H}$  COSY and HMBC correlations of **1**, **9** and **10**
